# Supplementary material for: Quantum dot immobilized acetylcholinesterase for the determination of organophosphate pesticides using graphene-chitosan nanocomposite modified electrode
Source: Royal Society of Chemistry journal article supplement (doi:10.1039/c3ay26599d), 2013-01-01
Supplement: c3ay26599d.pdf [file c3ay26599d.pdf]

**Quantum dot immobilized acetylcholinesterase for the determination of  
organophosphate pesticides using a glassy carbon electrode modified with a  
graphene-chitosan nanocomposite**

Jing Dong <sup>a,b1</sup>, Han Zhao <sup>c1</sup>, Fengmin Qiao <sup>a</sup>, Pei Liu <sup>a</sup>, Xindong Wang <sup>a</sup>, Shiyun Ai <sup>a\*</sup>

<sup>a</sup> *College of Chemistry and Material Science, Shandong Agricultural University, Taian, 271018,  
Shangdong, China*

<sup>b</sup> *College of Resources and Environment, Shandong Agricultural University, Taian,  
271018, Shangdong, China*

<sup>c</sup> *Weifang Entry-Exit Inspection and Quarantine Bureau of the People's Republic of China, Weifang,  
261041, Shangdong, China*

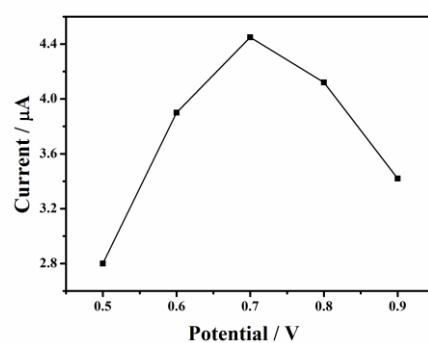

Fig. S1 Effect of electrodeposition potential on the response of the fabricated biosensor.

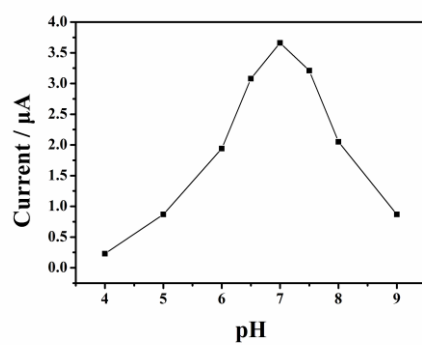

Fig. S2 Effect of pH on the response of the fabricated biosensor.

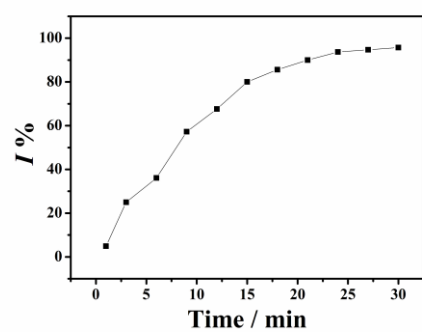

Fig. S3 Effect of inhibition time on the response of the fabricated biosensor.
